# Supplementary material
Source: PubMed Central journal article supplement (PMC8908879)
Supplement: NIHMS1782049-supplement-Supplementary_Information.pdf [file NIHMS1782049-supplement-Supplementary_Information.pdf]

---

**Supplementary information**

---

**Inhibition of aberrant tissue remodelling by mesenchymal stromal cells singly coated with soft gels presenting defined chemomechanical cues**

---

In the format provided by the  
authors and unedited

## Table of contents

|                    | Contents                                                                                                                          | Page |
|--------------------|-----------------------------------------------------------------------------------------------------------------------------------|------|
| <b>Suppl. Text</b> | Modeling MSC-mediated degradation of collagen by interstitial collagenases                                                        | 2-3  |
| <b>Figure S1</b>   | Effects of soluble inflammatory mediators on the expression of MMP isoforms in MSCs on plastic culture                            | 4    |
| <b>Figure S2</b>   | Effects of hydrogel elasticity on $\text{TNF}\alpha$ -induced expression of collagenases in primary MSC donors                    | 5    |
| <b>Figure S3</b>   | Effects of engineered gel coating on myofibroblast gene expression and $\text{TNF}\alpha$ -induced collagenase expression in MSCs | 6    |
| <b>Figure S4</b>   | Characterization of fibrotic lung injury induced by bleomycin                                                                     | 7    |
| <b>Figure S5</b>   | Characterization of cell dose and microgels in fibrotic lung injury                                                               | 8    |
| <b>Figure S6</b>   | Effects of primary mouse MSCs on fibrotic lung injury                                                                             | 9    |
| <b>Figure S7</b>   | Effects of gel coating on <i>in vivo</i> residence of firefly luciferase-expressing MSCs in the lungs                             | 10   |
| <b>Figure S8</b>   | Understanding mechanisms behind therapeutic efficacy of gel-coated MSCs in fibrotic lung injury                                   | 11   |
| <b>Figure S9</b>   | Effects of alginate microgels loaded with recombinant proteins on fibrotic lung injury                                            | 12   |
| <b>Table S1</b>    | Primer sequences for quantitative PCR                                                                                             | 13   |
| <b>Suppl. Code</b> | Source code for mathematical modeling                                                                                             | 13   |

## Supplementary Text

### Modeling MSC-mediated degradation of collagen by interstitial collagenases

We constructed a set of differential equations to model the effect of donor MSCs on collagen levels in lung tissue challenged by bleomycin (**Fig. 5A**). We use a simple equation to describe the kinetics of donor MSCs after *i.t.* delivery as follows:

$$\frac{dMSC}{dt} = (\beta_{MSC} - \alpha_{MSC})MSC \quad (Eq. 1.1)$$

$\beta_{MSC}$  is the production (or proliferation) rate, while  $\alpha_{MSC}$  is the death rate of donor MSCs. Based on the biodistribution kinetics data from *i.t.* delivery of MSCs (**Fig. S7**),  $\beta_{MSC} = 0$ , and  $\alpha_{MSC} = 0.937/\text{day}$ , which is equivalent to decay  $t_{1/2} = 0.74$  day or 17.78 hr.

The kinetics of bleomycin after delivery is described as follows:

$$\frac{dBleo}{dt} = -\alpha_{bleo}Bleo \quad (Eq. 1.2)$$

$\alpha_{bleo}$  is the clearance rate of bleomycin and set to 0.2505/day or  $t_{1/2} = 2.77$  day, starting from 2 day after bleomycin treatment as described<sup>1</sup>.

The kinetics of TNF $\alpha$  in the host is described as follows:

$$\frac{dTNF\alpha}{dt} = \beta_{tnf\alpha}Bleo - \alpha_{tnf\alpha}TNF\alpha \quad (Eq. 1.3)$$

$\beta_{tnf\alpha}$  is the production rate of TNF $\alpha$  in the host induced by bleomycin and set to 0.135.  $\alpha_{tnf\alpha}$  is the decay rate of TNF $\alpha$  and set to 0.08. These values are based on the previously described kinetics of TNF $\alpha$  when a single dose of bleomycin is administered<sup>2</sup>.

The kinetics of interstitial collagenases is described as follows:

$$\frac{dMMP}{dt} = \beta_{basal} + \beta_{mmp}\theta_{tnf\alpha}MSC - \alpha_{mmp}MMP \quad (Eq. 1.4)$$

$\beta_{basal}$  is the basal production rate of collagenases by the host and set to 300 pg/ml/day, which is within the previously described range in lung tissue<sup>3</sup>. Production of collagenases by donor MSCs depends on two factors: 1.  $\beta_{mmp}$ : the maximum production rate of collagenases from donor MSCs (varied during simulation from 0.4 to 4.0); 2.  $\theta_{tnf\alpha}$ : the dose response of TNF $\alpha$  to activate TNF $\alpha$  receptors on donor MSCs:

$$\theta_{tnf\alpha} = \frac{1}{1 + \left(\frac{K_{tnf\alpha}}{TNF\alpha}\right)^2} \quad (Eq. 1.5).$$

, where  $K_{tnf\alpha}$  is TNF $\alpha$  concentration to achieve the half-maximum activation of TNF $\alpha$  receptors and set to 1 ng/ml as described<sup>4</sup>.  $\alpha_{mmp}$  is the degradation rate of collagenases, for instance, by host TIMPs, and set to 0.693/day or  $t_{1/2} = 1$  day as described<sup>5</sup>.

The kinetics of total collagen in lung tissue is described as follows:

$$\frac{dCol}{dt} = \beta_{col}Bleo - \delta(Col) \quad (Eq. 1.6)$$

$\beta_{col}$  is the maximum production rate of collagen induced by bleomycin (Bleo) and set to 0.22  $\mu\text{g}/\text{mg}$  tissue/day starting 1 week after instillation of bleomycin (**Fig. S8B, iii**) as described<sup>6</sup>.  $\delta(Col)$  is the rate of collagen degradation based on the Michaelis-Menten equation:

$$\delta(Col) = V_{max} \frac{Col^2}{Col^2 + K_{col}^2} = \frac{\alpha_{col}MMP}{1 + \left(\frac{K_{col}}{Col}\right)^2} \quad (Eq. 1.7).$$

$\alpha_{col}$  is the catalytic rate constant of interstitial collagenases and set to 0.02/day or  $t_{1/2} = 34.67$  day as described<sup>7</sup>.  $K_{col}$  is the concentration of collagen at the half-maximum rate of degradation and set to 25  $\mu\text{g}/\text{mg}$  tissue or  $\sim 83 \mu\text{M}$  collagen (assuming tissue density  $\sim 1 \text{ mg}/\mu\text{l}$  and molar mass of collagen = 300 kDa), which is close to the previously described range for MMP1 and MMP13<sup>8</sup>.

## References

- 1 Wang, P. M. & Martin, W. J. Bleomycin Clearance from the murine lung after a single intratracheal administration. *FASEB journal : official publication of the Federation of American Societies for Experimental Biology* **22**, 710.716 (2008).
- 2 Smith, R. E., Strieter, R. M., Phan, S. H., Lukacs, N. & Kunkel, S. L. TNF and IL-6 mediate MIP-1alpha expression in bleomycin-induced lung injury. *Journal of leukocyte biology* **64**, 528-536 (1998).
- 3 Ratjen, F., Hartog, C. M., Paul, K., Wermelt, J. & Braun, J. Matrix metalloproteases in BAL fluid of patients with cystic fibrosis and their modulation by treatment with dornase alpha. *Thorax* **57**, 930-934, doi:10.1136/thorax.57.11.930 (2002).
- 4 Turner, D. A. *et al.* Physiological levels of TNFalpha stimulation induce stochastic dynamics of NF-kappaB responses in single living cells. *Journal of cell science* **123**, 2834-2843, doi:10.1242/jcs.069641 (2010).
- 5 Urbach, C. *et al.* Combinatorial Screening Identifies Novel Promiscuous Matrix Metalloproteinase Activities that Lead to Inhibition of the Therapeutic Target IL-13. *Chemistry & biology* **22**, 1442-1452, doi:10.1016/j.chembiol.2015.09.013 (2015).
- 6 Izbicki, G., Segel, M. J., Christensen, T. G., Conner, M. W. & Breuer, R. Time course of bleomycin-induced lung fibrosis. *Int J Exp Pathol* **83**, 111-119, doi:10.1046/j.1365-2613.2002.00220.x (2002).
- 7 Han, S. *et al.* Molecular mechanism of type I collagen homotrimer resistance to mammalian collagenases. *The Journal of biological chemistry* **285**, 22276-22281, doi:10.1074/jbc.M110.102079 (2010).
- 8 Solomonov, I. *et al.* Distinct biological events generated by ECM proteolysis by two homologous collagenases. *Proceedings of the National Academy of Sciences of the United States of America* **113**, 10884-10889, doi:10.1073/pnas.1519676113 (2016).

**A** *Mmp2*, D1 MSC, plastic

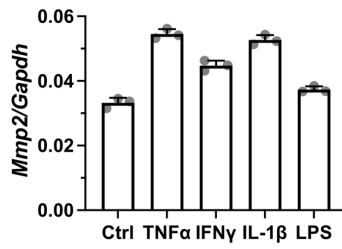

**B** Primary mouse MSC donors, plastic

i) *Mmp13*

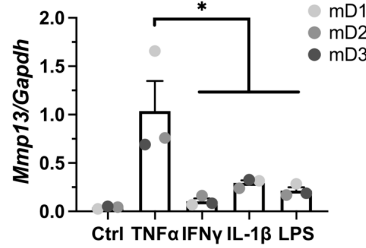

ii) *Mmp1a*

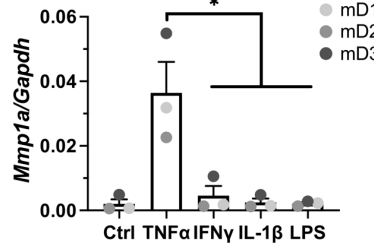

iii) *Mmp2*

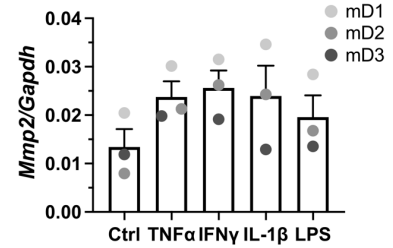

**C** Primary human MSC donors, plastic

i) *MMP13*

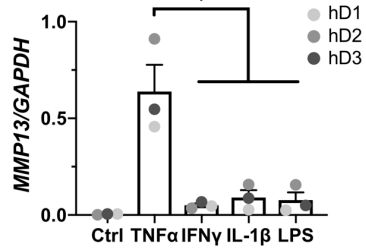

ii) *MMP1*

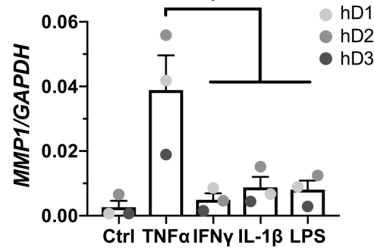

iii) *MMP2*

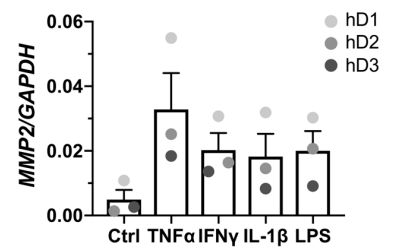

**Figure S1. Effects of soluble inflammatory mediators on the expression of MMP isoforms in MSCs on plastic culture.** Effects of control (Ctrl; PBS), TNFα, IFNγ, IL1β (100 ng/ml each), and LPS (2000 ng/ml) after treatment for 3 days on plastic culture on expression (normalized to *Gapdh* or *GAPDH*) of (A) *Mmp2* in D1 mouse MSCs.  $n = 3$  independent experiments, each performed in three replicates. (B) (i) *Mmp13*, (ii) *Mmp1a*, and (iii) *Mmp2* in primary mouse bone marrow MSCs. \*, (i)  $p = (0.6\sim2.6) \times 10^{-2}$ , (ii)  $p = (2.5\sim4.2) \times 10^{-3}$ . (C) (i) *MMP13*, (ii) *MMP1*, and (iii) *MMP2* in primary human bone marrow MSCs. \*, (i)  $p = (0.7\sim1.3) \times 10^{-3}$ , (ii)  $p = (0.8\sim1.7) \times 10^{-2}$ . For (B)-(C),  $n = 3$  independent experiments (from 3 different mouse or human donors), each performed in three replicates, and individual  $p$ -values were derived from one-way ANOVA followed by Tukey's multiple comparisons test. All data are shown as mean  $\pm$  SEM.

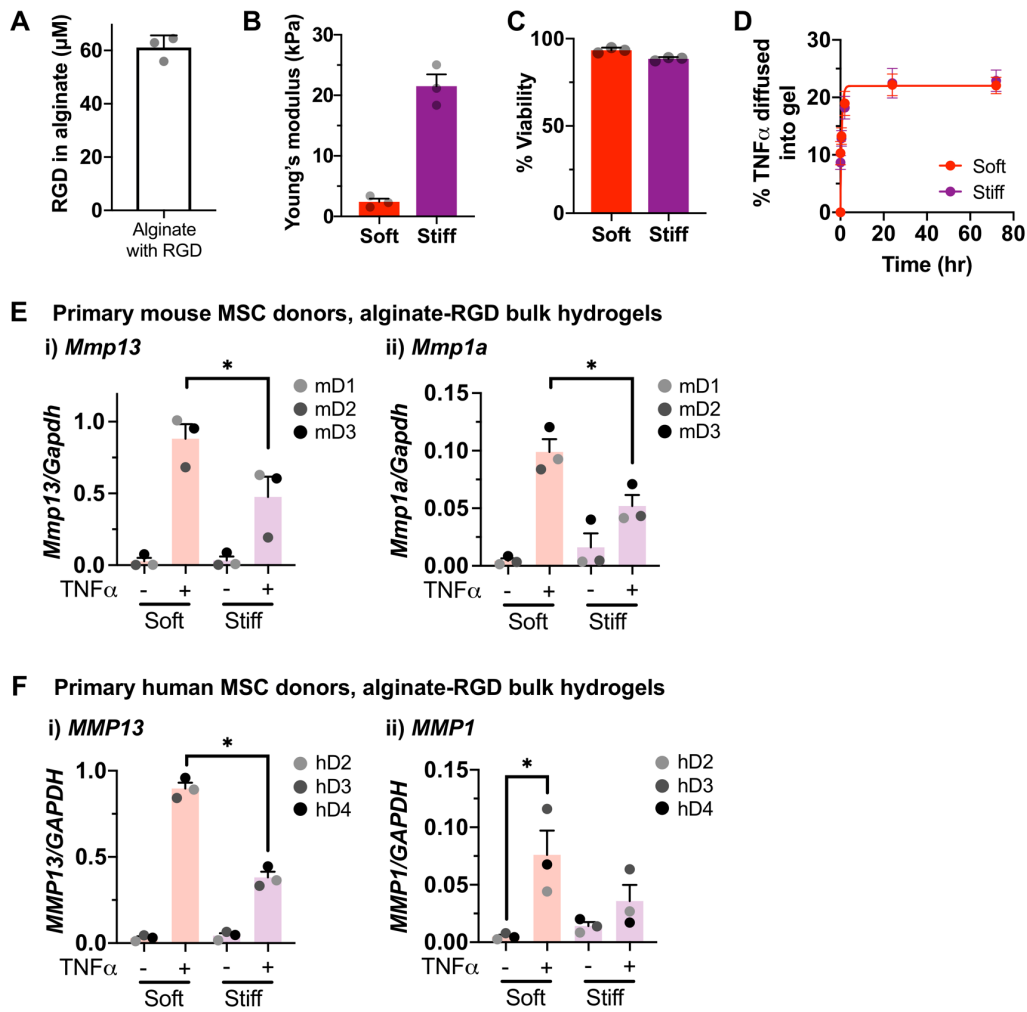

**Figure S2. Effects of hydrogel elasticity on TNF $\alpha$ -induced expression of collagenases in primary MSC donors.** (A) The concentration of RGD conjugated to alginate (LF200, ~240 kDa, 1% w/v) measured by LavaPep assay.  $n = 3$  batches. (B) Young's modulus of soft and stiff bulk alginate-RGD gels measured by atomic force microscopy.  $n = 3$  independent experiments, each averaged from six indentations of random regions. (C) Percentage viable (calcein $^{+}$ ) cells after encapsulation of D1 mouse MSCs in soft or stiff bulk gels and culturing for 3 days measured by flow cytometry.  $n = 3$  independent experiments, each performed in two replicates. (D) *In vitro* diffusion kinetics of exogenously added murine recombinant TNF $\alpha$  (100 ng/ml) into soft or stiff bulk gels determined by ELISA. One-phase association kinetics fit,  $t_{1/2} = \sim 0.43$  hr, plateau =  $\sim 22\%$  for both soft and stiff gels.  $n = 3$  independent experiments, each performed in two replicates, mean  $\pm$  SEM. (E) Effects of TNF $\alpha$  (100 ng/ml) on expression of (i) *Mmp13* and (ii) *Mmp1a* in primary mouse bone marrow MSCs in bulk alginate-RGD gels after 3-day treatment in culture. \*, (i)  $p = 4.8 \times 10^{-2}$ , (ii)  $p = 3.3 \times 10^{-2}$ . (F) Effects of TNF $\alpha$  (100 ng/ml) on expression of (i) *MMP13* and (ii) *MMP1* in primary human bone marrow MSCs in bulk alginate-RGD gels after 3-day treatment in culture. \*, (i)  $p = 2.6 \times 10^{-6}$ , (ii)  $p = 1.9 \times 10^{-2}$ . For (E)-(F),  $n = 3$  independent experiments (from 3 different mouse or human donors), each performed in three replicates, and individual  $p$ -values were derived from one-way ANOVA followed by Tukey's multiple comparisons test. All data are shown as mean  $\pm$  SEM.

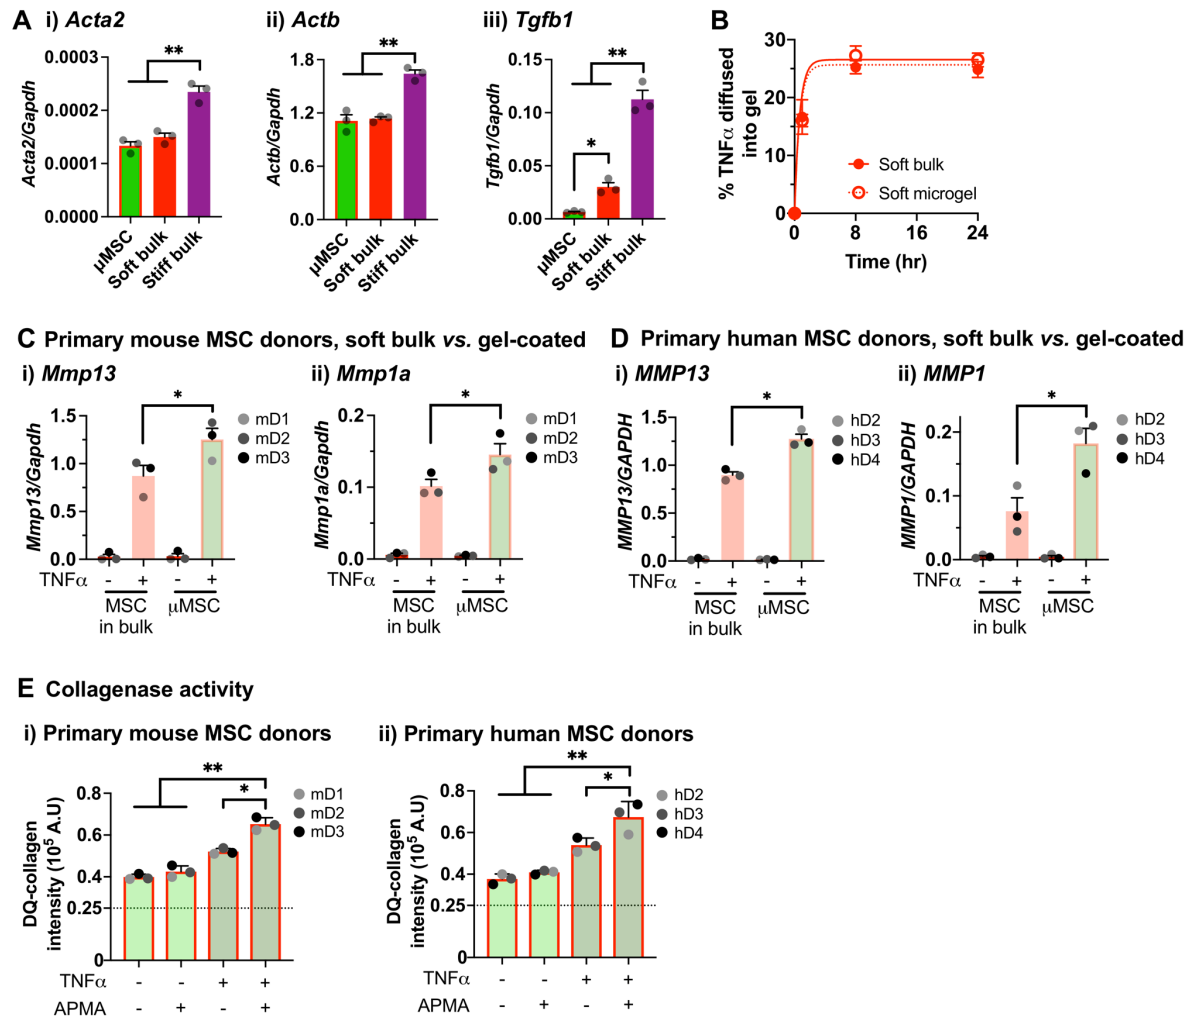

**Figure S3. Effects of engineered gel coating on myofibroblast gene expression and TNF $\alpha$ -induced collagenase expression in MSCs.** (A) D1 mouse MSCs were encapsulated in gel coating ( $\mu$ MSC), soft or stiff bulk alginate-RGD gels and cultured for 3 days prior to gene expression analysis of (i) *acta2*, (ii) *actb*, and (iii) *tgfb1*. \*, (iii)  $p = 4.6 \times 10^{-2}$ ; \*\*, (i)  $p = (0.4 \sim 1.1) \times 10^{-3}$ , (ii)  $p = (5.8 \sim 7.6) \times 10^{-4}$ , (iii)  $p = (2.1 \sim 9.0) \times 10^{-5}$  via one-way ANOVA followed by Tukey's multiple comparisons test.  $n = 3$  independent experiments, each performed in three replicates. (B) *In vitro* diffusion kinetics of recombinant murine TNF $\alpha$  into soft bulk gel or soft microgel ( $\sim 20 \mu\text{m}$  diameter) quantified by ELISA. One-phase association kinetics fit,  $t_{1/2} = \sim 0.46\text{hr}$ , plateau =  $\sim 26\%$  for both soft bulk and microgels.  $n = 3$  independent experiments, each performed in two replicates. (C) Effects of TNF $\alpha$  (100 ng/ml) on expression of i) *Mmp13* and ii) *Mmp1a* in primary mouse bone marrow MSCs in soft bulk gel or gel coating after 3-day treatment in culture. \*, (i)  $p = 4.7 \times 10^{-2}$ , (ii)  $p = 3.5 \times 10^{-2}$ . (D) Effects of TNF $\alpha$  (100 ng/ml) on expression of i) *MMP13* and ii) *MMP1* in primary human bone marrow MSCs in soft bulk gel or gel coating after 3-day treatment in culture. \*, (i)  $p = 9.1 \times 10^{-5}$ , (ii)  $p = 6.5 \times 10^{-3}$ . (E) Collagenase activity in the conditioned media from (i) gel-coated primary mouse MSCs or (ii) gel-coated primary human MSCs. \*, (i)  $p = 5.0 \times 10^{-4}$ , (ii)  $p = 2.1 \times 10^{-2}$ ; \*\*, (i)  $p = (4.0 \sim 9.1) \times 10^{-6}$  (ii)  $p = (1.4 \sim 3.2) \times 10^{-4}$ . For (C)-(E),  $n = 3$  independent experiments (from 3 different mouse or human donors), each performed in three replicates, and individual  $p$ -values were derived from one-way ANOVA followed by Tukey's multiple comparisons test. All data are shown as mean  $\pm$  SEM.

## A Kinetics after instillation of bleomycin

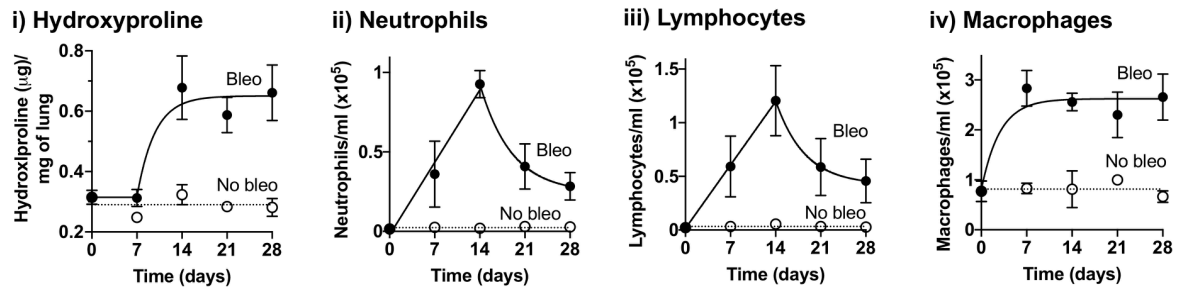

## B Defining fibrotic mass

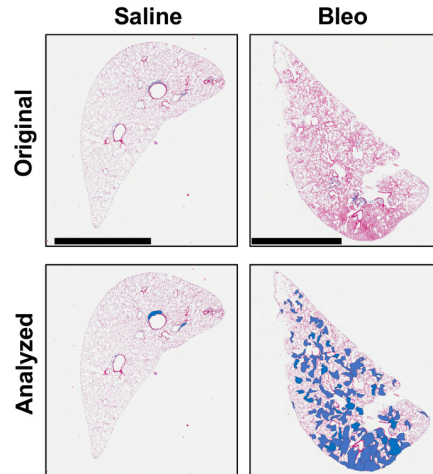

## C Defining normal vs. fibrotic alveoli

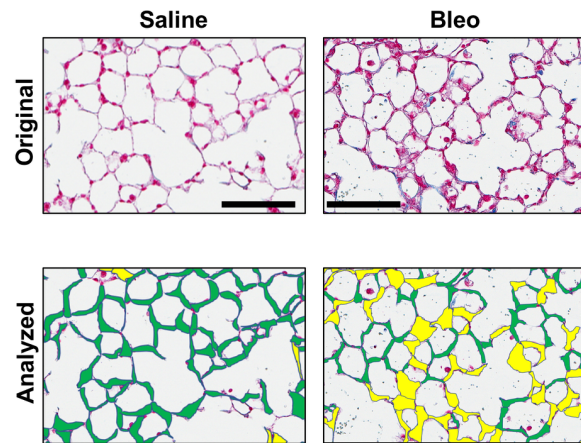

**Figure S4. Characterization of fibrotic lung injury induced by bleomycin.** (A) Kinetics of (i) collagen deposition, and infiltration of (ii) neutrophils, (iii) lymphocytes, and (iv) macrophages in bronchoalveolar lavage fluid in the first 28 days (4 weeks) after a single dose of bleomycin (bleo) treatment (0.015U per 20 g mouse). Data points from the no bleo group are fitted to a straight line with slope = 0. For (i) and (iv), data points from the bleo group are fitted to a one-phase association kinetics curve with  $t_{1/2} \sim 2$  days from 7-day and initial time points, respectively. For both (ii) and (iii), data points from the bleo group are fitted to a straight line between 0-14 days, and an exponential decay curve between 14-28 days with  $t_{1/2} \sim 3$  days.  $n = 3$  animals. Data are shown as mean  $\pm$  SD. (B) Representative images selected from 9 sections showing automatic selection of fibrotic mass (blue) from histology sections with Masson's trichrome staining at low magnification (scale bar = 3 mm). (C) Representative images out of 9 tissue sections showing automatic selection of normal (green) and fibrotic (yellow) alveoli from Masson's trichrome stained histology sections at high magnification (scale bar = 200 μm).

**A Decreasing the dose of gel-coated MSCs to 10,000 or 30,000 per 20 g mouse**

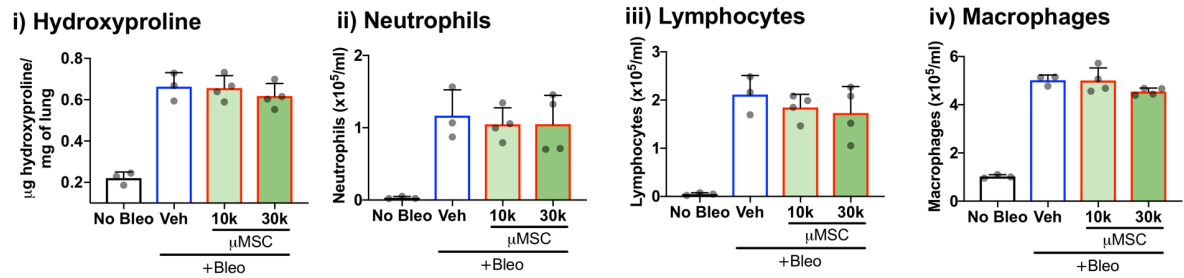

**B Increasing the dose of uncoated MSCs to 500,000 per 20 g mouse**

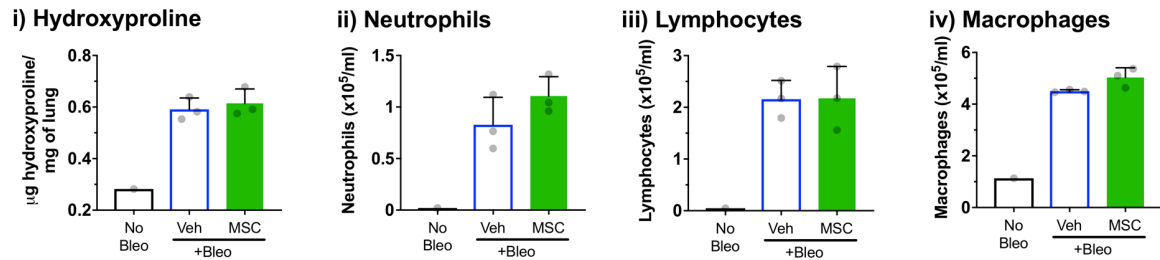

**C Empty alginate-RGD microgels, 100,000 per 20 g mouse**

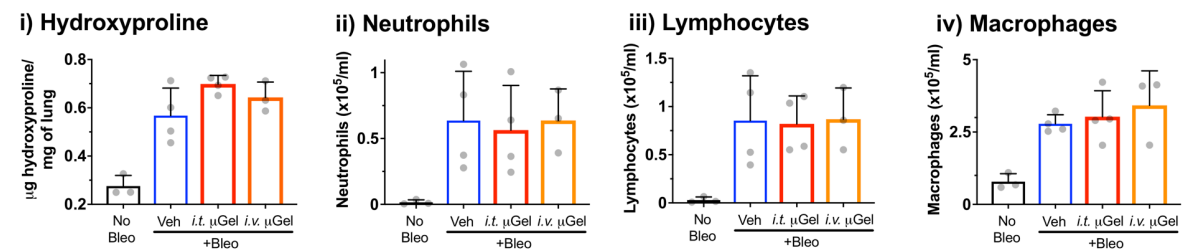

**Figure S5. Characterization of cell dose and microgels in fibrotic lung injury.** The experimental design is described in Fig. 3A. **(A)** Effects of gel-coated D1 mouse MSCs ( $\mu\text{MSC}$ ) with lower doses (10,000 and 30,000 per 20 g mouse) on (i) hydroxyproline levels, and infiltration of (ii) neutrophils, (iii) lymphocytes, and (iv) macrophages in bronchoalveolar lavage fluid.  $n = 3$  animals for no bleo or bleo with vehicle (veh),  $n = 4$  for bleo with each tested dose of gel-coated MSCs. **(B)** Effects of uncoated D1 mouse MSCs with increased cell dose (500,000 per 20 g mouse) on (i) hydroxyproline levels, and infiltration of (ii) neutrophils, (iii) lymphocytes, and (iv) macrophages in bronchoalveolar lavage fluid.  $n = 1$  animal for no bleo,  $n = 3$  for bleo with either vehicle or MSCs. **(C)** Effects of alginate-RGD microgels ( $\mu\text{Gel}$ ,  $\sim 20 \mu\text{m}$  in diameter) without cell encapsulation (100,000 per 20 g mouse) delivered via intratracheal (*i.t.*) or intravenous (*i.v.*) route on (i) hydroxyproline levels, and infiltration of (ii) neutrophils, (iii) lymphocytes, and (iv) macrophages in bronchoalveolar lavage fluid.  $n = 3$  animals for no bleo and bleo + *i.v.*  $\mu\text{Gel}$  groups,  $n = 4$  for other groups. All data are shown as mean  $\pm$  SD.

**A** *i.t.* delivery of primary mouse MSC donors

i) Hydroxyproline

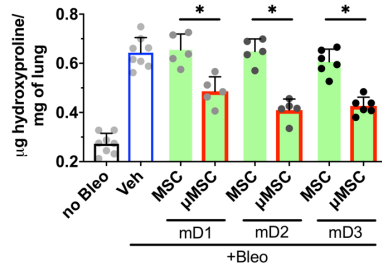

ii) Elast-to-col ratio Index

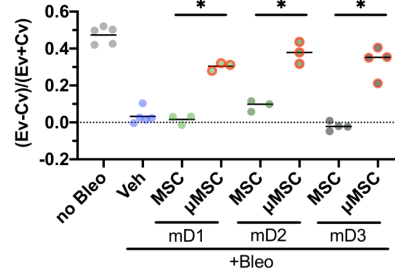

iii) Neutrophils

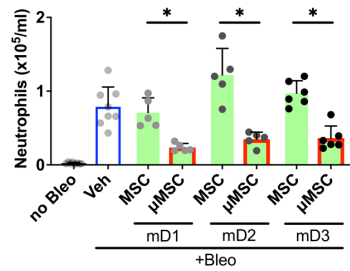

iv) Lymphocytes

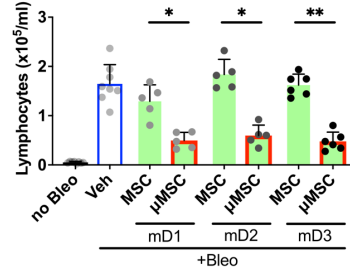

v) Macrophages

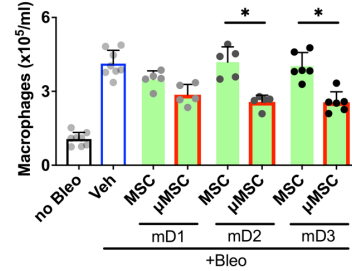

**B** *i.v.* delivery of primary MSCs from a mouse donor (mD1)

i) Hydroxyproline

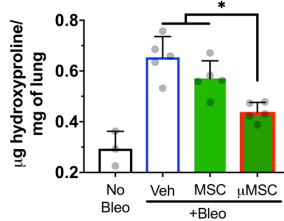

ii) Neutrophils

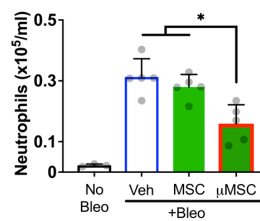

iii) Lymphocytes

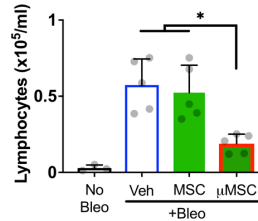

iv) Macrophages

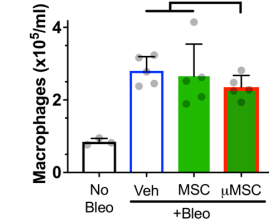

**Figure S6. Effects of primary mouse MSCs on fibrotic lung injury.** The experimental design is described in **Fig. 3A**. Treatment 1 week after bleomycin (bleo) – vehicle (veh), uncoated MSCs or gel-coated MSCs (µMSC) with the dose 100,000 per 20 g mouse. **(A)** Intratracheal (*i.t.*) delivery of primary MSCs from 3 different mouse donors. (i) Hydroxyproline levels [ $^*$ ,  $p = (0.1\sim4.5) \times 10^{-2}$ ]. (ii) Parenchymal elastin ( $E_v$ )-to-collagen ( $C_v$ ) volume ratio index ( $(E_v - C_v)/(E_v + C_v)$ ) [ $^*$ ,  $p = (0.1\sim4.1) \times 10^{-2}$ ]. Quantification of (iii) neutrophils [ $^*$ ,  $p = (0.2\sim4.9) \times 10^{-2}$ ], (iv) lymphocytes [ $^*$ ,  $p = (0.3\sim4.6) \times 10^{-2}$ ;  $^{**}$ ,  $p = 5.0 \times 10^{-5}$ ], and (v) macrophages [ $^*$ ,  $p = (1.3\sim2.7) \times 10^{-2}$ ] in bronchoalveolar lavage fluid. For (i) and (iii)-(v),  $n = 8$  animals for each of no bleo and bleo only;  $n = 5$  for each of mD1 and mD2 MSC donor;  $n = 6$  for mD3 MSC donor. For (ii),  $n = 5$  animals for each of no bleo and bleo only;  $n = 3$  for each of mD1 and mD2 MSC donor;  $n = 4$  for mD3 MSC donor, each data point averaged from three fields of view from a lung of each animal. **(B)** Intravenous (*i.v.*) delivery of primary MSCs from a mouse donor (mD1). (i) Hydroxyproline levels [ $^*$ ,  $p = (0.9\sim4.6) \times 10^{-2}$ ]. Quantification of (ii) neutrophils [ $^*$ ,  $p = (2.1\sim4.2) \times 10^{-2}$ ], (iii) lymphocytes [ $^*$ ,  $p = (2.4\sim4.9) \times 10^{-2}$ ], and (iv) macrophages [n.s.,  $p > 0.05$ ] in bronchoalveolar lavage fluid.  $n = 3$  animals for no bleo,  $n = 5$  for other groups. Individual  $p$ -values were derived from one-way Welch ANOVA followed by Dunnett T3 multiple comparisons test. All data are shown as mean  $\pm$  SD.

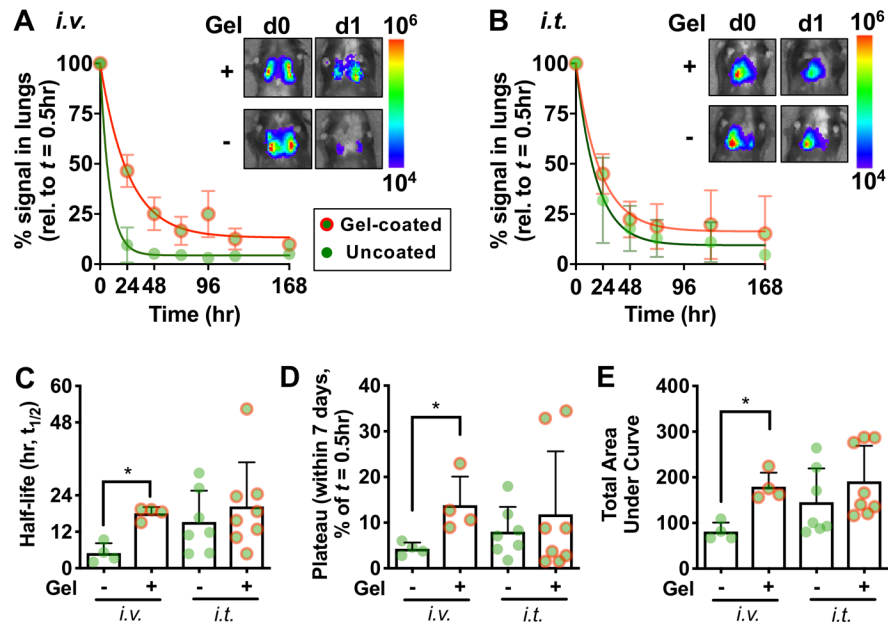

**Figure S7. Effects of gel coating on *in vivo* residence of firefly luciferase-expressing MSCs in the lungs.** Kinetics of MSCs after (A) intravenous (*i.v.*) and (B) intratracheal (*i.t.*) delivery, based on average radiance (photons/sec/cm<sup>2</sup>/sr) in the lung region. Inlet: representative bioluminescence images. Data are fitted to an exponential decay curve. Quantification of each kinetics data set in terms of (C) half-life [ $^*$ ,  $p = 4.9 \times 10^{-4}$ ], (D) plateau [ $^*$ ,  $p = 2.5 \times 10^{-2}$ ], and (E) total area under curve [ $^*$ ,  $p = 1.7 \times 10^{-3}$ ].  $p$ -values are derived from two-tailed unpaired T-test with equal SD.  $n = 4$  animals for *i.v.* groups,  $n = 7$  for *i.t.* uncoated MSCs,  $n = 8$  for *i.t.* gel-coated MSCs. All data are shown as mean  $\pm$  SD.

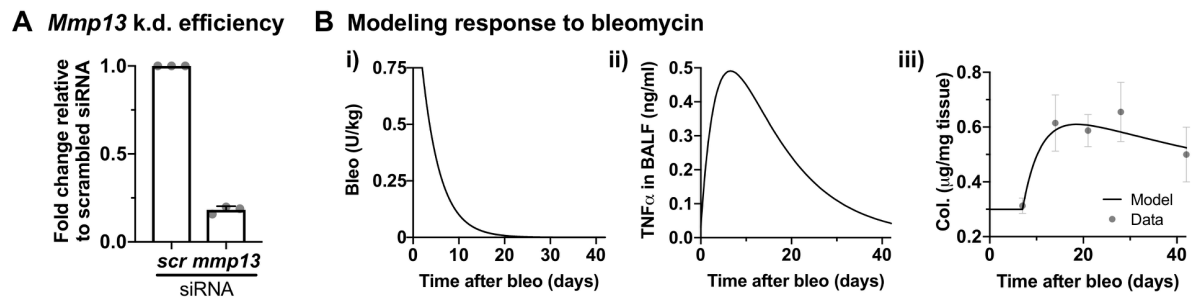

**Figure S8. Understanding mechanisms behind therapeutic efficacy of gel-coated MSCs in fibrotic lung injury.** **(A)** siRNA knockdown efficiency of *Mmp13* in D1 MSCs relative to scrambled (*scr*) siRNA.  $n = 3$  independent experiments, each performed in three replicates. **(B)** Simulation results showing kinetics of (i) bleomycin (U/kg) after administration, (ii) TNF $\alpha$  in bronchoalveolar lavage fluid (BALF, ng/ml), and (iii) total collagen ( $\mu$ g/mg tissue). For (iii), experimental data from 3 animals are also shown. Mean  $\pm$  SD.

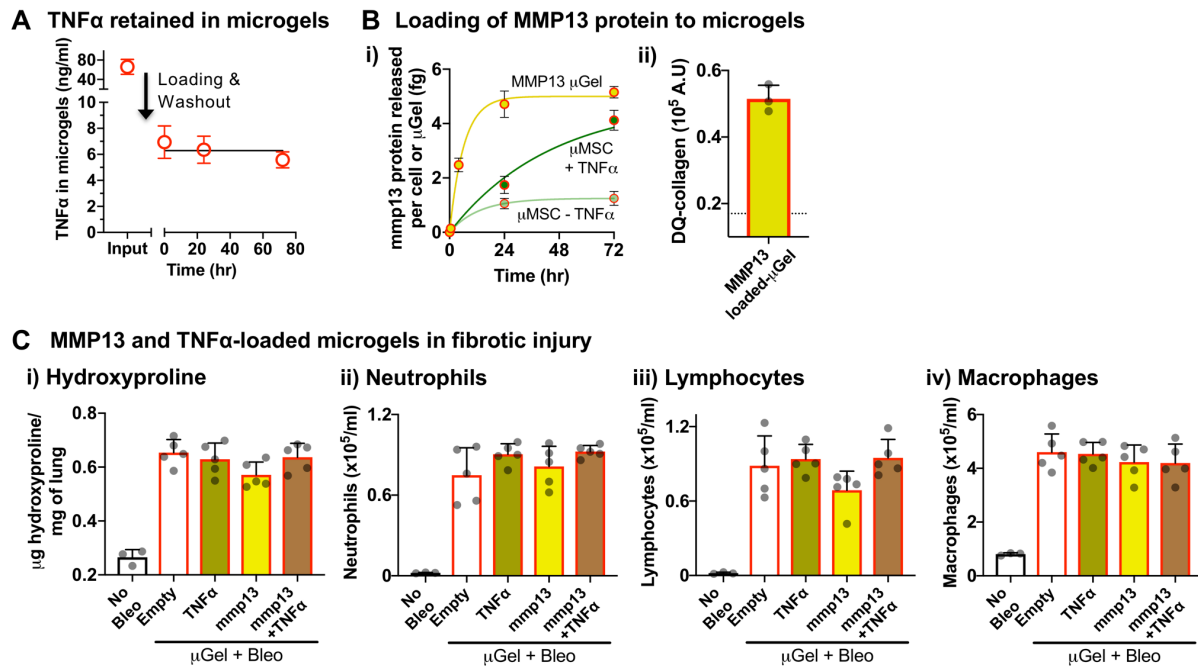

**Figure S9. Effects of alginate microgels loaded with recombinant proteins on fibrotic lung injury.** (A) Quantification of recombinant TNF $\alpha$  retained in alginate-RGD microgels ( $\sim 20$   $\mu$ m diameter) after incubation of TNF $\alpha$  ( $\sim 65$  ng/ml) for 1 day, followed by washout and incubation in culture for 3 days.  $n = 3$  independent experiments, each performed in two replicates, mean  $\pm$  SEM. (B) Characterization of alginate-RGD microgels loaded with catalytically-active mouse MMP13 proteins. (i) *In vitro* mouse MMP13 protein release kinetics determined by ELISA. One-phase association kinetics fit, ( $t_{1/2}$ , plateau) values for MMP13-loaded microgels ( $\mu$ Gel): (4.3 hr, 5.0 fg/gel), gel-coated MSCs with TNF $\alpha$  ( $\mu$ MSC + TNF $\alpha$ ): (30.7 hr, 4.8 fg/cell), gel-coated MSCs without TNF $\alpha$  ( $\mu$ MSC - TNF $\alpha$ ): (8.9 hr, 1.25 fg/cell). (ii) Collagenase activity of MMP13-loaded microgels. The media were collected from MMP13-loaded microgels (50,000 gels per 200  $\mu$ l) for 1 day, followed by mixing with fluorogenic collagen-I substrate (DQ-collagen, 100  $\mu$ g/ml) and incubating for 1 day before readout. The dotted line indicated a background level from a complete DMEM.  $n = 3$  independent experiments, each performed in two replicates, mean  $\pm$  SEM. (C) Effects of alginate-RGD microgels loaded with TNF $\alpha$  or MMP13 proteins (100,000 per 20 g mouse) on (i) hydroxyproline levels, and infiltration of (ii) neutrophils, (iii) lymphocytes, and (iv) macrophages in bronchoalveolar lavage fluid. Microgels were *i.t.* delivered 3 weeks after bleomycin treatment, followed by readout after 1 week of microgel treatment.  $n = 3$  animals for no bleo,  $n = 5$  for bleo with each treatment group, mean  $\pm$  SD.

**Table S1. Primer sequences for quantitative PCR**

| Target                              | Sequence                                                 |
|-------------------------------------|----------------------------------------------------------|
| Mouse <i>Gapdh</i><br>(NM_008084)   | F: CTTTGTCAAGCTCATTTCTGG<br>R: TCTTGCTCAGTGCCTTGC        |
| Mouse <i>Mmp1a</i><br>(NM_032006)   | F: CCAGTTAACTTGACGCTGC<br>R: GAAACTGTGGATGTCTCTGGG       |
| Mouse <i>Mmp2</i><br>(NM_008610)    | F: ACCAAGAACTTCCGATTATCCC<br>R: CAGTACCAGTGTCTCAGTATCAGC |
| Mouse <i>Mmp13</i><br>(NM_008607)   | F: TTGATGCCATTACCAGTCTCC<br>R: ACATGGTTGGGAAGTTCTGG      |
| Mouse <i>Acta2</i><br>(NM_007392)   | F: GTGAAGAGGAAGACAGCACAG<br>R: GCCCATTCCAACCATTACTCC     |
| Mouse <i>Actb</i><br>(NM_007393.5)  | F: ACCTTCTACAATGAGCTGCG<br>R: CTGGATGGCTACGTACATGG       |
| Mouse <i>Tgfb1</i><br>(NM_011577.2) | F: CCTGAGTGGCTGTCTTTTGA<br>R: CGTGGAGTTTGTTATCTTTGCTG    |
| Human <i>GAPDH</i><br>(NM_002046)   | F: ACATCGCTCAGACACCATG<br>R: TGTAGTTGAGGTCAATGAAGGG      |
| Human <i>MMP1</i><br>(NM_002421)    | F: GCACAAATCCCTTCTACCCG<br>R: TGAACAGCCCAGTACTTATTCC     |
| Human <i>MMP2</i><br>(NM_001127891) | F: ACCCATTTACACCTACACCAAG<br>R: TGTTTGCAGATCTCAGGAGTG    |
| Human <i>MMP13</i><br>(NM_002427)   | F: GATGACGATGTACAAGGGATCC<br>R: ACTGGTAATGGCATCAAGGG     |

**Supplementary Code.** Source code for mathematical modeling. The MATLAB code consists of two files and were used to solve a set of ordinary differentiation equations for modeling of MSC-mediated collagen degradation.
